# Supplementary material
Source: HighWire-hosted journal article supplement (https://bjsm.bmj.com/content/51/17/1301)
Supplement: inline-supplementary-material-1 [file inline-supplementary-material-1.docx]

| **Supplementary table 1:** Descriptive statistics regarding CMJ and SJ in women Olympic athletes. | | |
| --- | --- | --- |
| **Physical Performance test** | **Mean ±SD** | **Median** |
| n=59 (SJ: 54 Power, 5 Technical, CMJ: 56 Power, 3 Technical) | | |
| CMJ (cm) | 33.6 ±4.7 | 32.9 (31.2 - 36.3) |
| SJ (cm) | 32.0 ±4.9 | 31.0 (29.2 - 34.3) |
| CMJ and SJ presented as both mean ±SD and median with upper and lower quartiles. CMJ= countermovement jump, SJ= squat jump. Power= athletes in explosive sports, Technical= athletes in technical sports. | | |
