# Supplementary material
Source: HighWire-hosted journal article supplement (https://bjsm.bmj.com/content/51/17/1301)
Supplement: inline-supplementary-material-2 [file inline-supplementary-material-2.docx]

| **Supplementary table 4:** Correlations between endogenous hormones and body composition for women Olympic athletes not using HC and for the total group of athletes**.** | | | | |
| --- | --- | --- | --- | --- |
|  | **Athletes not using HC (n=41)** | | **Athletes total (n=65)** | |
| Parameters | DHEA | 5-DIOL | DHEA | 5-DIOL |
| Lean mass total | **rs = 0.44**  **p = 0.004** | **rs = 0.34**  **p = 0.031** | **rs = 0.27**  **p = 0.03** | rs = 0.16  p = 0.196 |
| Lean mass legs | **rs = 0.49**  **p = 0.001** | **rs = 0.39**  **p = 0.012** | **rs = 0.33**  **p = 0.007** | **rs = 0.25**  **p = 0.041** |
| Correlation coefficient (r) and p-values presented. Significant data marked in bold text. 5-DIOL = 5-androstene-3β, 17β-diol, DHEA= dehydroepiandrosterone, DHT= dihydrotestosterone, HC= hormonal contraceptives. | | | | |
