# Supplementary material
Source: HighWire-hosted journal article supplement (https://bjsm.bmj.com/content/51/17/1301)
Supplement: inline-supplementary-material-3 [file inline-supplementary-material-3.docx]

| **Supplementary table 5:** Correlations between endogenous hormones and physical performance tests (CMJ, SJ) for women Olympic athletes not using HC and for the total group of athletes. | | | | |
| --- | --- | --- | --- | --- |
|  | **Athletes not using HC** | | **Athletes total** | |
| **Performance test** | SJ | CMJ | SJ | CMJ |
| **Number** | 37 | 38 | 59 | 59 |
| **DHEA** | **rs = 0.37**  **p = 0.026** | **rs = 0.41**  **p = 0.011** | **rs =0.39**  **p = 0.002** | **rs = 0.36**  **p = 0.005** |
| **5-DIOL** | rs = 0.28  p = 0.093 | **rs = 0.39**  **p = 0.015** | **rs = 0.34**  **p = 0.009** | **rs = 0.37**  **p = 0.004** |
| **DHT** | rs = 0.32  p = 0.055 | **rs = 0.47**  **p = 0.003** | **rs = 0.27**  **p = 0.037** | **rs = 0.39**  **p = 0.002** |
| Correlation coefficient (r) and p-values presented. Significant data marked in bold text. 5-DIOL= 5-androstene-3β, 17β-diol, CMJ= countermovement jump, DHEA= dehydroepiandrosterone, DHT= dihydrotestosterone, HC= hormonal contraceptives, SJ= squat jump. | | | | |
